# Supplementary material for: Simultaneous crystallization of anin situformed conjugated polymer and inorganic matrix for structure solving
Source: Royal Society of Chemistry journal article supplement (doi:10.1039/c7cc06620a), 2017-01-01
Supplement: c7cc06620a1.pdf [file c7cc06620a1.pdf]

# Simultaneous Crystallization of *in situ* Formed Conjugated Polymer and Inorganic Matrix for Structure Solving

Guangfeng Liu<sup>a</sup>, Peiyang Gu<sup>a</sup>, Lina Nie<sup>a</sup>, and Qichun Zhang<sup>\*ab</sup>

<sup>a</sup>School of Materials Science and Engineering, Nanyang Technological University Singapore 639798, Singapore

<sup>b</sup>Division of Chemistry and Biological Chemistry School of Physical and Mathematical Sciences, Nanyang Technological University Singapore 639798, Singapore

## Contents:

**Materials and Methods**

**Figures S1 to S9**

**Table S1**

## Materials and Methods

**Experimental section:** 4,4'-bipyridine, 4-bromopyridine hydrochloride, PbBr<sub>2</sub>, HBr aqueous solution (HBr > 45%), Br<sub>2</sub>, CH<sub>3</sub>OH, CH<sub>3</sub>CH<sub>2</sub>OH and CH<sub>3</sub>CH<sub>2</sub>CH<sub>2</sub>OH were purchased from Sigma-Aldrich Company. All starting materials are analytical grade and were used as received without further purification. To synthesize compound **1**, a mixture of PbBr<sub>2</sub> (3.84 mmol, 1.4 g) and 4,4'-bipyridine (0.64 mmol, 0.1 g) was heated with HBr aqueous solution (HBr > 45%, 2 ml), Br<sub>2</sub> (0.1 ml) and CH<sub>3</sub>OH (CH<sub>3</sub>CH<sub>2</sub>OH or CH<sub>3</sub>CH<sub>2</sub>CH<sub>2</sub>OH can also be used in this reaction) (5 ml) in 25 ml Teflon-lined stainless-steel autoclaves at 120 °C for 5 days. Upon cooling to room temperature at 10 K h<sup>-1</sup>, light yellow needle crystals of **1** were obtained in ~ 50% yield (based on 4,4'-bipyridine). To synthesize compound **2**, a mixture of PbBr<sub>2</sub> (3.84 mmol, 1.4 g) and 4-bromopyridine hydrochloride (1.28 mmol, 0.25 g) was heated with HBr aqueous solution (HBr > 45%, 2 ml), Br<sub>2</sub> (0.1 ml) and CH<sub>3</sub>CH<sub>2</sub>CH<sub>2</sub>OH (5 ml) in 25 ml Teflon-lined stainless-steel autoclaves at 120 °C for 5 days. Upon cooling to room temperature at 10 K h<sup>-1</sup>, light yellow needle crystals of **2** were obtained in > 70% yield (based on 4-bromopyridine hydrochloride).

**Single-crystal X-ray diffraction.** Suitable single-crystals of compounds **1** and **2** were selected for single-crystal X-ray data collection with a Bruker SMART APEX-II CCD area detector on a D8 goniometer. Data were collected using graphite-monochromated and 0.5 mm-Mono Cap-collimated Mo-*K*α radiation ( $\lambda = 0.71073 \text{ \AA}$ ) with the  $\omega$  scan method.<sup>1</sup> Data were processed with the SAINT program of the APEX2 software for reduction and cell refinement. Multi-scan absorption corrections were applied by using the SADABS program for area detector. All structures were solved by the direct method and refined by the full-matrix least-squares method on  $F^2$  (SHELX-97).<sup>2</sup> All non-H atoms were refined anisotropically. For compound **2**, hydrogen atoms were placed in idealized positions and included as riding with  $U_{\text{iso}}(\text{H}) = 1.2 U_{\text{eq}}(\text{C})$ . Crystallographic data and structural refinements are summarized in Table S1.

**Powder x-ray diffraction.** The phase identity and purity of crystalline samples **1** were verified by power X-ray diffraction (PXRD) on a Bruker-AXS D8 ADVANCE X-ray diffractometer equipped with Cu K $\alpha$  radiation ( $\lambda = 1.54056 \text{ \AA}$ ) in the  $2\theta$  range of  $9\text{--}50^\circ$ , with a step size of  $0.02^\circ$  and scan-speed of  $0.2 \text{ s step}^{-1}$  at room temperature.

**UV–Vis spectrum.** Absorption data were collected on a Hitachi U-4100 UV–vis–NIR spectrophotometer equipped with an integrating sphere operating in diffuse-reflectance mode at the ambient environment for crystalline sample **1**.

**FT-IR spectroscopy.** The attenuated total reflectance Fourier transform infrared spectra (ATR-FTIR) of crystalline **1** sample were recorded on a Thermo-Nicolet Nexus 670 spectrometer in the range of  $650\text{--}4,000 \text{ cm}^{-1}$  at room temperature.

**Thermal Measurement.** Thermogravimetric test (TGA) for compound **1** is carried out on a TGA analyzer (Q500). The sample was placed in Pt crucible, and heated at a rate of  $10 \text{ K} \cdot \text{min}^{-1}$  from room temperature to  $690 \text{ }^\circ\text{C}$  under flowing nitrogen gas.

Elemental analysis. Elemental analysis was done by using a PerkinElmer 2400Series II CHNS/O elemental analyzer.

#### **Photoelectron Chemical Measurements.**

Electrode Preparation: To fabricate the photoelectrode, a well-dispersed  $5 \text{ mg mL}^{-1}$  suspension for compound **1** with pure ethanol as solvent was prepared by brief sonication in a water bath. Fluorine-doped tin oxide (FTO) coated glasses ( $1.0 \times 2.0 \text{ cm}^2$ ) were used as the substrate. The substrates were cleaned thoroughly by sonication in 5% detergent (Decon  $\text{\textcircled{R}}$  90) for 30 minutes first and then rinsed with deionized water (DI water) for several times, which were followed by sonication in DI water,

acetone, 2-propanol for each 15 minutes. After that, 50  $\mu\text{L}$  of different sample suspensions were dropped onto the surface of FTO substrates, which were masked using Ti foil with an effective area of 0.283  $\text{cm}^2$ . The samples were dried under vacuum at 80  $^\circ\text{C}$  for 6 hrs. Photoelectrochemical Measurements: the photoelectrochemical tests were performed using an electrochemical workstation (CHI760E). The PEC property of compound **1** was measured in a three-electrode electrochemical system with Ag/AgCl electrode in a saturated KCl solution, Pt plate, thin film of **1**, and 0.5 M  $\text{Na}_2\text{SO}_4$  as reference, counter, working electrodes, and electrolyte under a 300 W xenon lamp (Newport) coupled to an AM 1.5G filter. To convert the measured voltage into the voltage vs. the reversible hydrogen electrode (RHE), the following calculation was performed:  $V_{\text{RHE}} = V_{\text{Ag/AgCl}} + 0.197 + 0.059 \times \text{pH}$ .

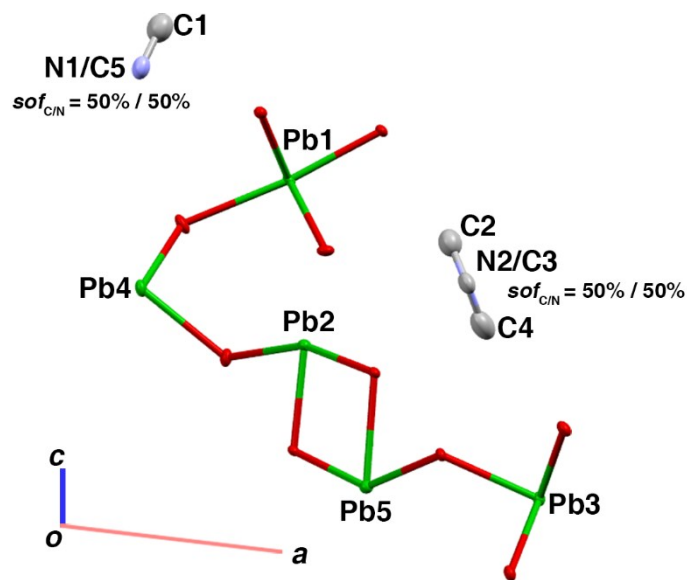

**Figure S1.** The asymmetric unit of compound **1** with 50% probability ellipsoids. Color scheme: Pb(II), green; Br, red; C, grey; N, blue.

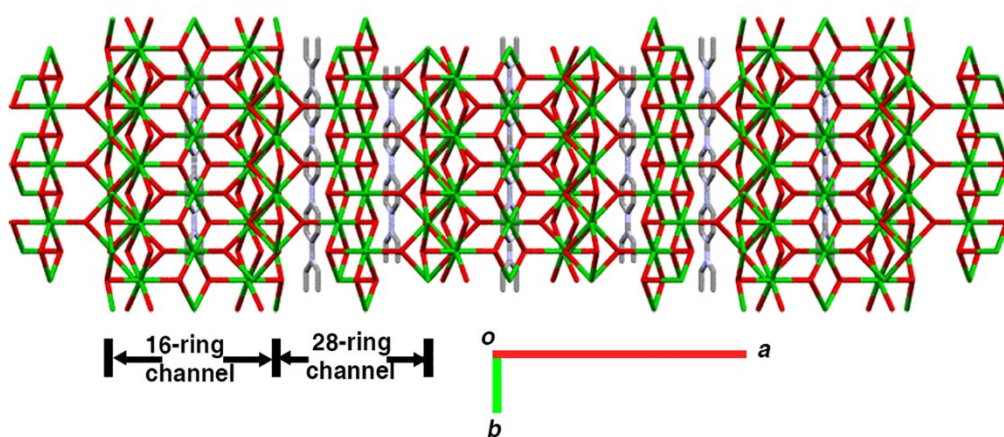

**Figure S2.** The poly(1,4-pyridinium) polycationic chains are encapsulated in the bromoplumbate 3D open frameworks (viewed along the  $c$  axis). Color scheme: Pb(II), green; Br, red; C, grey; N, blue.

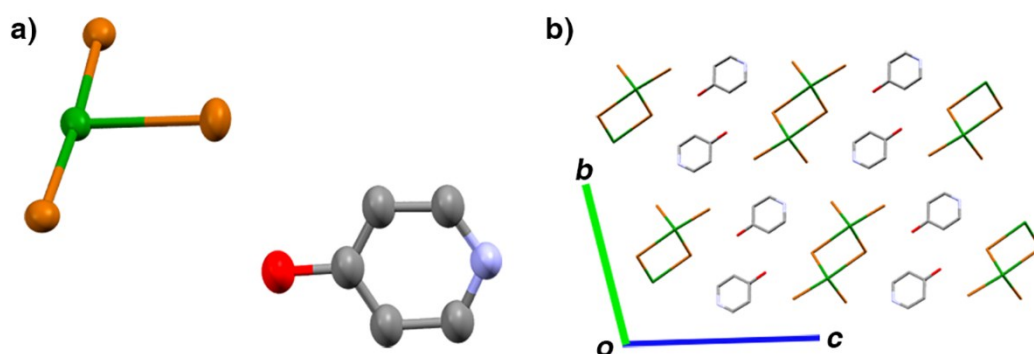

**Figure S3.** a) The asymmetric unit of compound **2** with 50% probability ellipsoids. Color scheme: Pb(II), green; Br, brown; O, red; C, grey; N, blue. The hydrogen atoms are omitted for clarity. b) The packing pattern of compound **2** viewed along the  $a$ -axis, showing 1D  $[\text{PbBr}_3]_n^-$  chains.

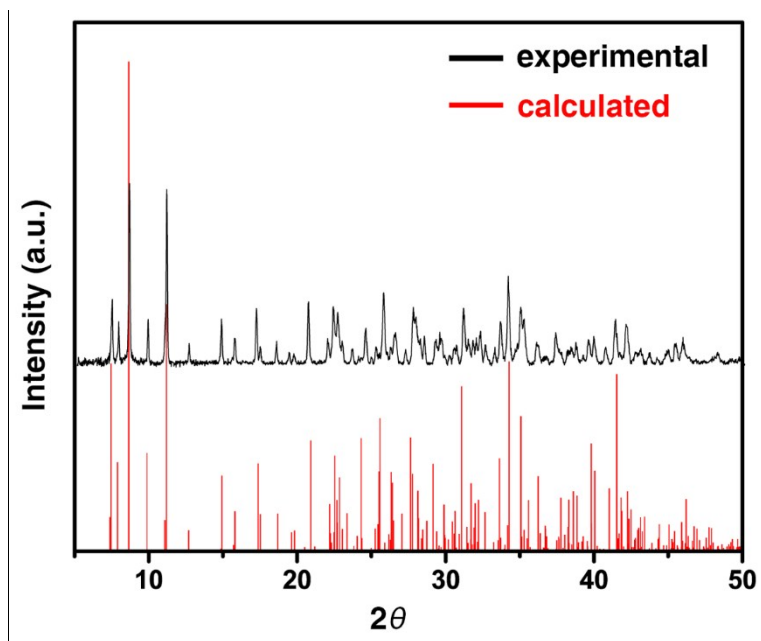

**Figure S4.** Simulated and experimental XRD powder patterns of compound **1**.

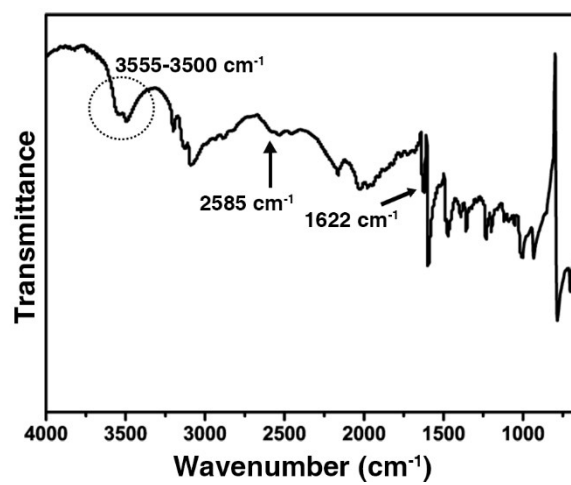

**Figure S5.** The FT-IR spectrum of compound **1**.

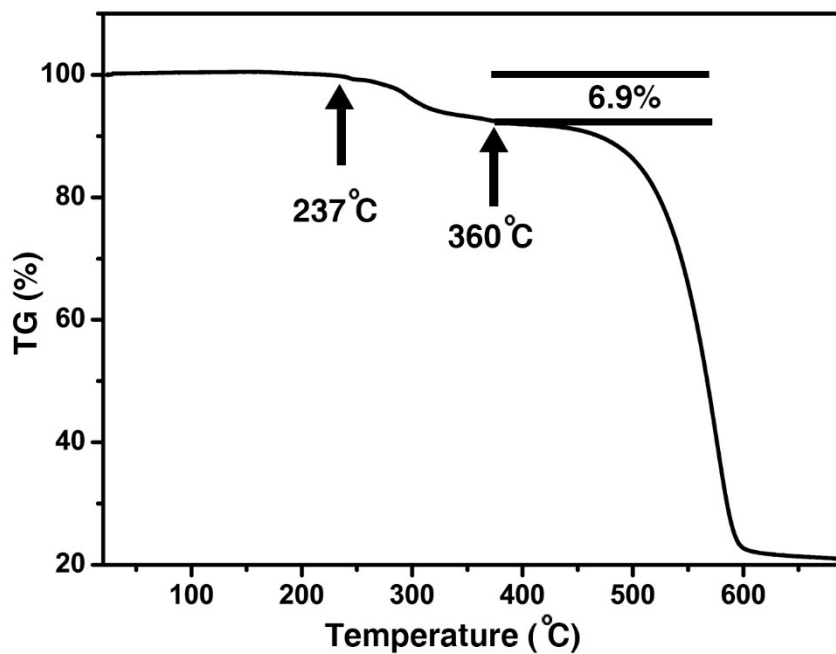

Figure S6. TGA curve of compound 1.

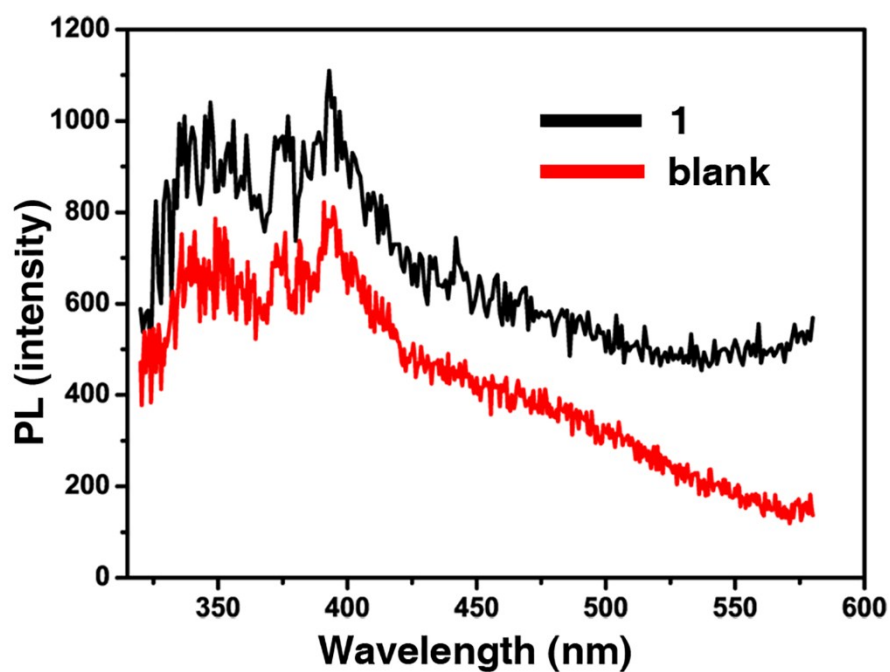

Figure S7. The PL spectrum of compound 1 with the excitation wavelength as 300 nm.

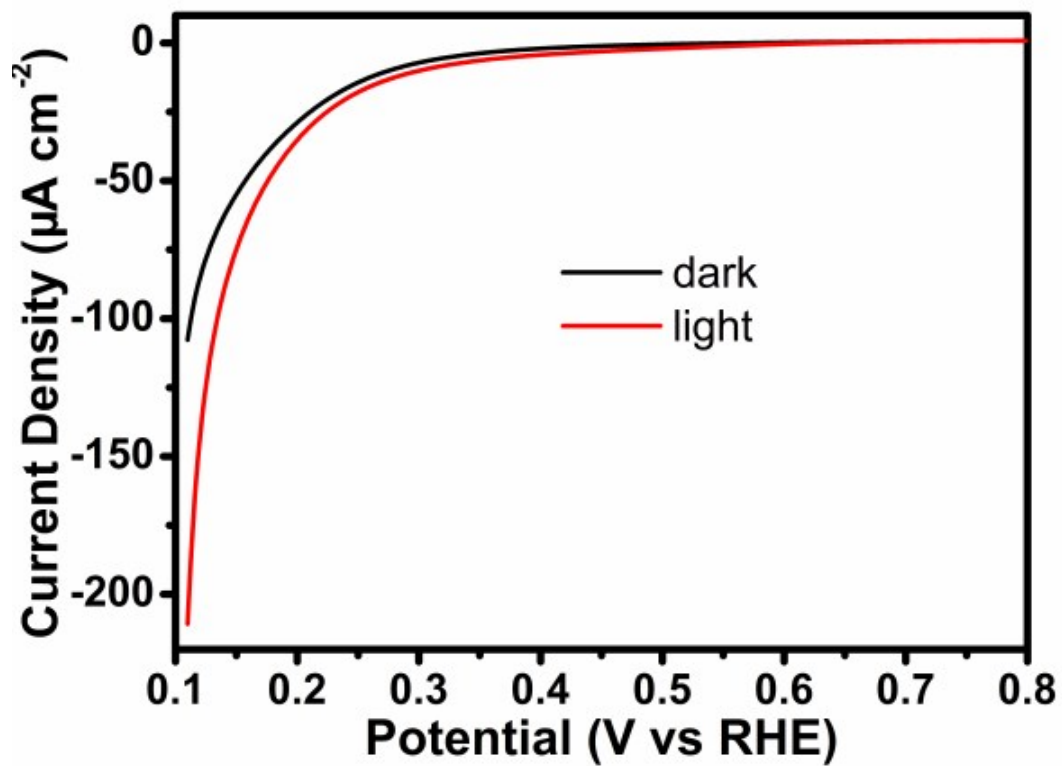

**Figure S8.** LSV of film of **1** under dark (black line) and under simulated solar light irradiation (red line) in 0.5 M  $\text{Na}_2\text{SO}_4$  aqueous solution.



**Table S1.** Crystallographic data and structure refinement parameters of compound **1** and **2**.

| Compound                                              | <b>1</b>                         | <b>2</b>     |
|-------------------------------------------------------|----------------------------------|--------------|
| Crystal system                                        | Monoclinic                       | triclinic    |
| Space group                                           | <i>C</i> <sub>2</sub> / <i>m</i> | P-1          |
| Z                                                     | 2                                | 2            |
| color                                                 | faint yellow                     | faint yellow |
| a (Å)                                                 | 47.7482 (16)                     | 4.3093 (8)   |
| b (Å)                                                 | 4.34560 (10)                     | 10.586 (2)   |
| c (Å)                                                 | 12.0277 (4)                      | 12.335 (2)   |
| $\alpha$ (deg)                                        | 90                               | 103.012 (2)  |
| $\beta$ (deg)                                         | 96.628 (3)                       | 97.348 (2)   |
| $\gamma$ (deg)                                        | 90                               | 94.651 (2)   |
| V (Å <sup>3</sup> )                                   | 2479.00 (13)                     | 540.23 (18)  |
| $\lambda$ (Mo K $\alpha$ ) (Å)                        | 0.71073                          | 0.70173      |
| Collected                                             | 26766                            | 2481         |
| reflns                                                | 3203                             | 2481         |
| Unique reflns                                         | 130                              | 102          |
| Parameters                                            | 0.0335                           | 0.0421       |
| R (int)                                               | 0.0204                           | 0.0368       |
| R <sub>1</sub> [ <i>I</i> > 2 $\sigma$ ( <i>I</i> )]  | 0.0455                           | 0.1044       |
| wR <sub>2</sub> [ <i>I</i> > 2 $\sigma$ ( <i>I</i> )] | 1.178                            | 1.081        |
| GOF                                                   |                                  |              |

[S1] APEX2 (version 2009.9-0); Bruker AXS Inc., Madison, WI, **2009**.

[S2] Sheldrick, G. M., *Acta. Crystallogr.* **2008**, *A64*, 112.
